# Supplementary material
Source: PubMed Central journal article supplement (PMC2744114)
Supplement: NIHMS113664-supplement-1_si_001.pdf [file NIHMS113664-supplement-1_si_001.pdf]

## Supporting Information

### Synthesis, activity and pharmacophore development for isatin-b-thiosemicarbazones with MDR1-selective activity

Matthew D. Hall, Noeris K. Salam, Jennifer L. Hellawell, Henry M. Fales, Caroline B. Kensler, Joseph A. Ludwig, Gergely Szakacs, David E. Hibbs, Michael M. Gottesman

#### Contents

**Supporting information Figure S1.** Structures and names of non-thiosemicarbazone compounds that satisfied at least 3 of 7 sites, including AH<sub>1</sub>R<sub>1</sub>, pharmacophore site matches for each compound.

**Supporting information Table S1.** List of kinases examined, and summary of data from kinase inhibition assay against NSC73306. Compounds were tested for 10 doses starting at 20  $\mu$ M with 3-fold serial dilutions. The kinase reactions were run at 1  $\mu$ M ATP and 1% DMSO final concentration. For IC<sub>50</sub> values >50, partial inhibition was observed at the highest dose-point, however this was not adequate to generate an IC<sub>50</sub> value.

**Supporting information Figure S1.** Structures and names of non-thiosemicarbazone compounds that satisfied at least 3 of 7 sites, including AH<sub>1</sub>R<sub>1</sub>, pharmacophore site matches for each compound.

|                                                                                     |                                                                                      |
|-------------------------------------------------------------------------------------|--------------------------------------------------------------------------------------|
| 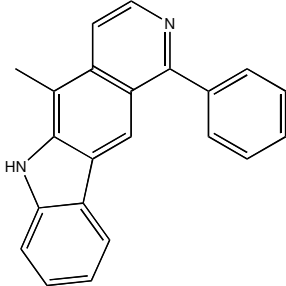   |    |
| <p><b>NSC86715:</b> AH<sub>1</sub>H<sub>2</sub>R<sub>2</sub></p>                    | <p><b>NSC168468:</b> AH<sub>1</sub>H<sub>2</sub>R<sub>1</sub>R<sub>2</sub></p>       |
|    |    |
| <p><b>NSC347512:</b> AH<sub>1</sub>H<sub>2</sub>R<sub>2</sub></p>                   | <p><b>NSC356777:</b> AH<sub>1</sub>H<sub>2</sub>H<sub>3</sub>R<sub>2</sub></p>       |
|   |   |
| <p><b>NSC621481:</b> AH<sub>1</sub>H<sub>2</sub>R<sub>1</sub>R<sub>2</sub></p>      | <p><b>NCS622927:</b> AH<sub>1</sub>H<sub>2</sub>R<sub>2</sub></p>                    |
|  |  |
| <p><b>NCS636097:</b> AH<sub>1</sub>H<sub>2</sub>R<sub>1</sub>R<sub>2</sub></p>      | <p><b>NSC651859:</b> AH<sub>1</sub>H<sub>2</sub>H<sub>3</sub>R<sub>2</sub></p>       |
|  |  |
| <p><b>NSC672027:</b> AH<sub>1</sub>H<sub>2</sub>H<sub>3</sub>R<sub>2</sub></p>      | <p><b>NSC672036:</b> AH<sub>1</sub>H<sub>2</sub>H<sub>3</sub>R<sub>2</sub></p>       |

|                                                                                   |                                                                                            |
|-----------------------------------------------------------------------------------|--------------------------------------------------------------------------------------------|
| 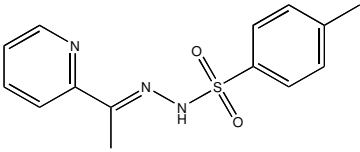 |          |
| <p><b>NSC692419:</b> AH<sub>1</sub>H<sub>2</sub>H<sub>3</sub>R<sub>2</sub></p>    | <p><b>NSC67399:</b> AH<sub>1</sub>H<sub>2</sub>H<sub>3</sub>R<sub>1</sub>R<sub>2</sub></p> |
|  |                                                                                            |
| <p><b>NSC697120:</b> AH<sub>1</sub>H<sub>2</sub>R<sub>2</sub></p>                 |                                                                                            |

**Supporting information Table S1.** List of kinases examined, and summary of data from kinase inhibition assay against NSC73306. Compounds were tested for 10 doses starting at 20  $\mu$ M with 3-fold serial dilutions. The kinase reactions were run at 1  $\mu$ M ATP and 1% DMSO final concentration. For IC<sub>50</sub> values >50, partial inhibition was observed at the highest dose-point, however this was not adequate to generate an IC<sub>50</sub> value.

| Kinase         | IC <sub>50</sub> ( $\mu$ M) | IC <sub>50</sub> ( $\mu$ M) |
|----------------|-----------------------------|-----------------------------|
|                | Staurosporine               | NSC73306                    |
| ABL1           | 0.136                       | >50.00                      |
| AKT1           | 0.006                       | -                           |
| Aurora A       | 0.022                       | -                           |
| BTK            | 0.036                       | -                           |
| CAMK2 $\beta$  | <0.0001                     | -                           |
| CDK1/cyclin B  | 0.0016                      | -                           |
| CDK2/cyclin A  | 0.00036                     | >50.00                      |
| CHK1           | <0.0001                     | >50.00                      |
| CHK2           | 0.0067                      | -                           |
| c-MET          | 0.103                       | -                           |
| c-SRC          | 0.0013                      | -                           |
| DAPK1          | 0.0005                      | -                           |
| EGFR           | 0.132                       | -                           |
| EPHA3          | 0.048                       | -                           |
| EPHB4          | 0.233                       | -                           |
| ERBB4          | 0.282                       | -                           |
| ERK1           | 7.791                       | -                           |
| ERK2           | 4.491                       | -                           |
| FGFR1          | 0.009                       | -                           |
| FGFR2          | 0.034                       | -                           |
| FGFR3          | 0.018                       | -                           |
| FLT1           | 0.019                       | -                           |
| FLT3           | 0.0010                      | >50.00                      |
| FLT4           | 0.0019                      | -                           |
| GSK3 $\beta$   | 0.0052                      | -                           |
| HIPK1          | 2.639                       | -                           |
| IR             | 0.0085                      | -                           |
| IRAK4          | 0.034                       | -                           |
| JAK2           | 0.0047                      | -                           |
| JAK3           | 0.00015                     | -                           |
| KDR            | 0.0035                      | -                           |
| LCK            | 0.004                       | -                           |
| LYN            | 0.00049                     | -                           |
| MINK           | 0.00049                     | -                           |
| MST2           | 0.00041                     | -                           |
| P38 $\alpha$   | No inhibition               | -                           |
| PAK2           | 0.0010                      | -                           |
| PDGFR $\alpha$ | <0.0001                     | -                           |
| PHK $\gamma$ 2 | <0.0001                     | -                           |
| PIM1           | 0.0027                      | >50.00                      |
| PKA            | 0.00031                     | -                           |
| PKC $\alpha$   | 0.00070                     | >50.00                      |
| PLK2           | 0.197                       | >50.00                      |
| RET            | 0.00046                     | -                           |
| ROCK1          | 0.0011                      | >50.00                      |

|                  |         |       |
|------------------|---------|-------|
| <b>RSK1</b>      | <0.0001 | 34.90 |
| <b>SYK</b>       | <0.0001 | -     |
| <b>TAK1-TAB1</b> | 0.035   | -     |
| <b>TIE2/TEK</b>  | 0.052   | -     |
| <b>TRKA</b>      | 0.0017  | -     |
